# Supplementary material
Source: PubMed Central journal article supplement (PMC5476302)

## Supplementary information

PCR gels corresponding to Extended Data Figure 2g. The dashed lines indicate the cropped areas presented in Extended Figure Data 2g.

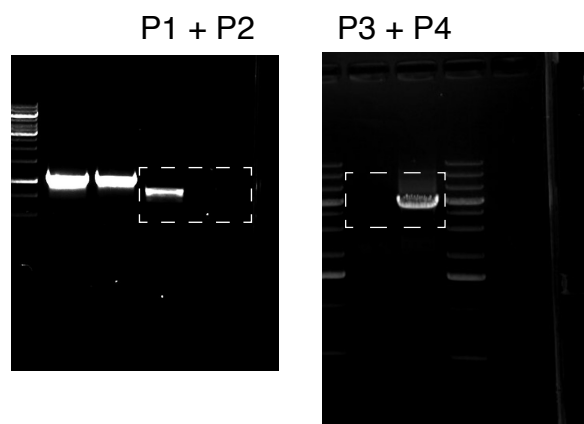

Supplement: NIHMS864507-supplement-1.pdf [file NIHMS864507-supplement-1.pdf]
